# Supplementary material
Source: publisher figshare collection journal article supplement (https://rs.figshare.com/ndownloader/files/10845143)
Supplement: Supplementary file 1 [file 10845143]

ColSize_EI	Wegg	Wdest_W	Qdest_W	Qegg	Wdest_Q	Qdest_Q	ColSize_SF	Wegg_SF	Wdest_SF	Qdest_SF
41	24	16	5	5	2	0	92	16	6	10
65	20	17	0	9	1	3	121	16	4	12
137	21	17	3	8	6	0	128	6	3	2
154	21	15	3	7	3	3	134	4	2	2
172	21	12	0	8	0	1	156	2	1	0
179	30	10	13	6	1	2	163	6	0	4
190	22	4	3	3	0	0	179	20	4	12
110	24	21	3	12	4	5	218	3	0	1
91	19	15	1	9	5	1
45	14	12	0	9	1	0
